# Supplementary material for: XPO1 target occupancy measurements confirm the selinexor recommended phase 2 dose
Source: PubMed Central journal article supplement (PMC5746399; doi:10.18632/oncotarget.22801), 2017-11-30
Supplement: oncotarget-08-110503-s001.pdf [file oncotarget-08-110503-s001.pdf]

## XPO1 target occupancy measurements confirm the selinexor recommended phase 2 dose

### SUPPLEMENTARY MATERIALS

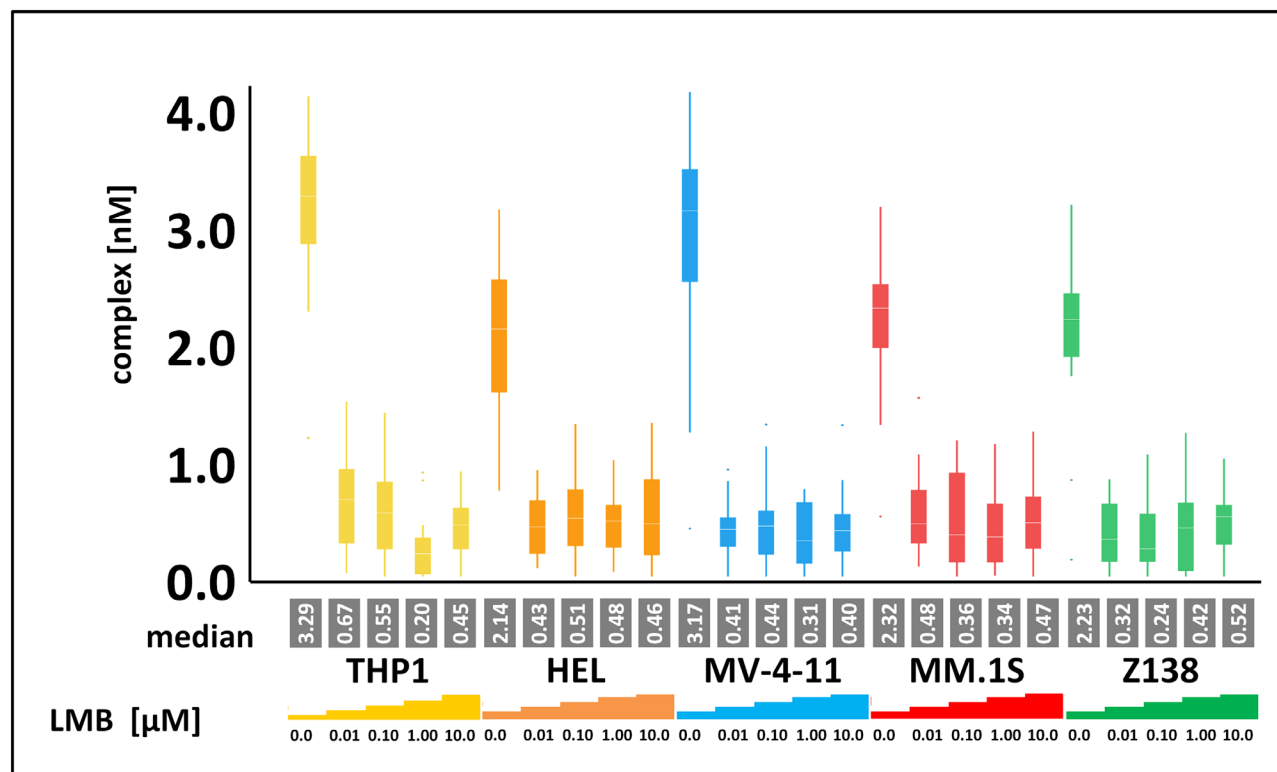

**Supplementary Figure 1: LMB occupies XPO1 similarly in all cell lines at very low doses.** FCCS measurements of XPO1 occupancy from THP-1, HEL, MV-4-11, MM.1S, and Z138 cell lines grown to confluency and treated with 0, 0.01, 0.1, 1, and 10 μM LMB for 4 hours. Cells were washed, harvested and lysed using PBS-Tween buffer and incubated with fluorescence labeled LMB (LMB<sub>647</sub>) at a concentration of approximately 25 nM and ATTO488 labeled anti XPO1 antibody (XPO1 AB<sub>488</sub>) for 2 hours and complex formation was analyzed on a ConfoCor2 Correlation Spectroscopy. The normalized (untreated = 100%) values for the XPO1 complexes were plotted for LMB.
